# Supplementary material
Source: publisher figshare collection journal article supplement (https://gsajournals.figshare.com/ndownloader/files/25417232)
Supplement: Supplementary file 1 [file 25417232]

Supplementary Material

**Evolution of Chi motifs in Proteobacteria**

Angélique Buton & Louis-Marie Bobay

Department of Biology, University of North Carolina Greensboro, 321 McIver Street, PO Box 26170, Greensboro, NC 27402, USA

**Table S2.** Number of species identified with Chi motifs across Markov models (25 motifs searched).

| **Markov model** | **Number of species** | **Proteobacteria** | **%** | **Terrabacteria** | **%** |
| --- | --- | --- | --- | --- | --- |
| M0 | 124 | 107 | 86.3 | 17 | 13.7 |
| M1 | 137 | 102 | 74.5 | 35 | 25.5 |
| M2 | 225 | 161 | 71.6 | 64 | 28.4 |
| M3 | 124 | 106 | 86.3 | 17 | 13.7 |
| M4 | 78 | 70 | 89.7 | 8 | 10.3 |
| M5 | 72 | 63 | 85.7 | 9 | 14.3 |
